# Supplementary material
Source: PubMed Central journal article supplement (PMC11404273)
Supplement: media-1.pdf [file media-1.pdf]

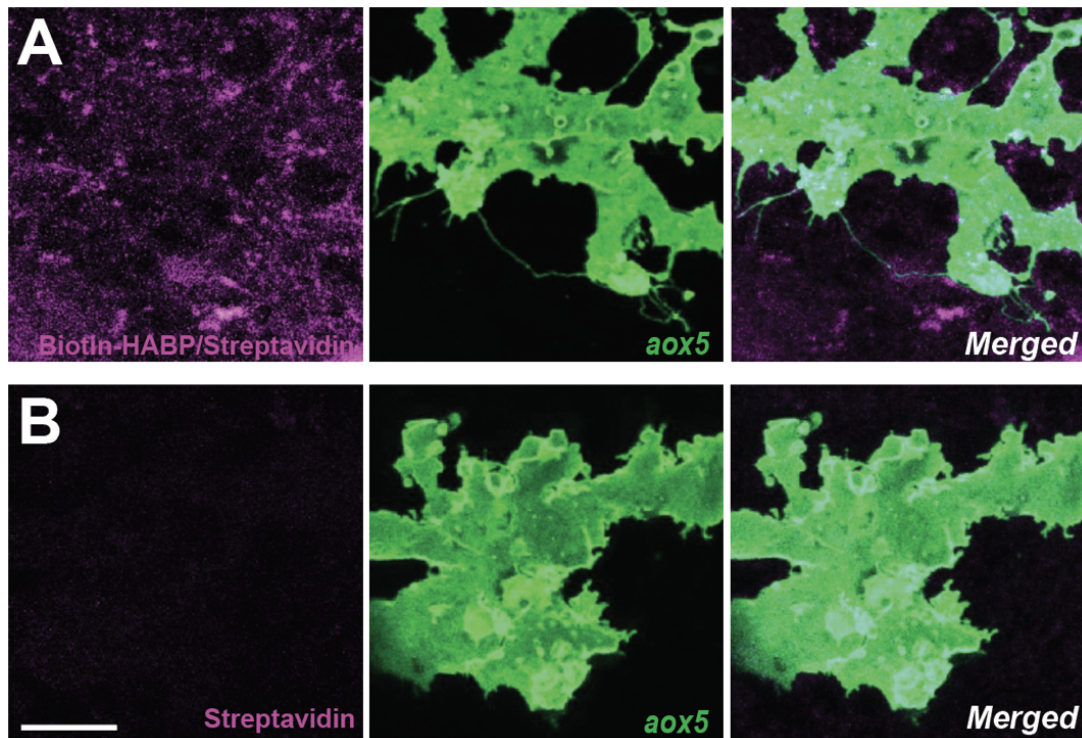

**Figure S1. Lack of apparent Hyaluronic acid binding protein (HABP) expression in xanthoblasts**  
 (A) Xanthoblasts appear to show no overlapping expression when traced using Biotin-conjugated HABP and Alexa-546-labelled streptavidin. (B) A control experiment with Alexa-546 streptavidin alone did not result in any detectable signal. Scale bar represents 20µm.

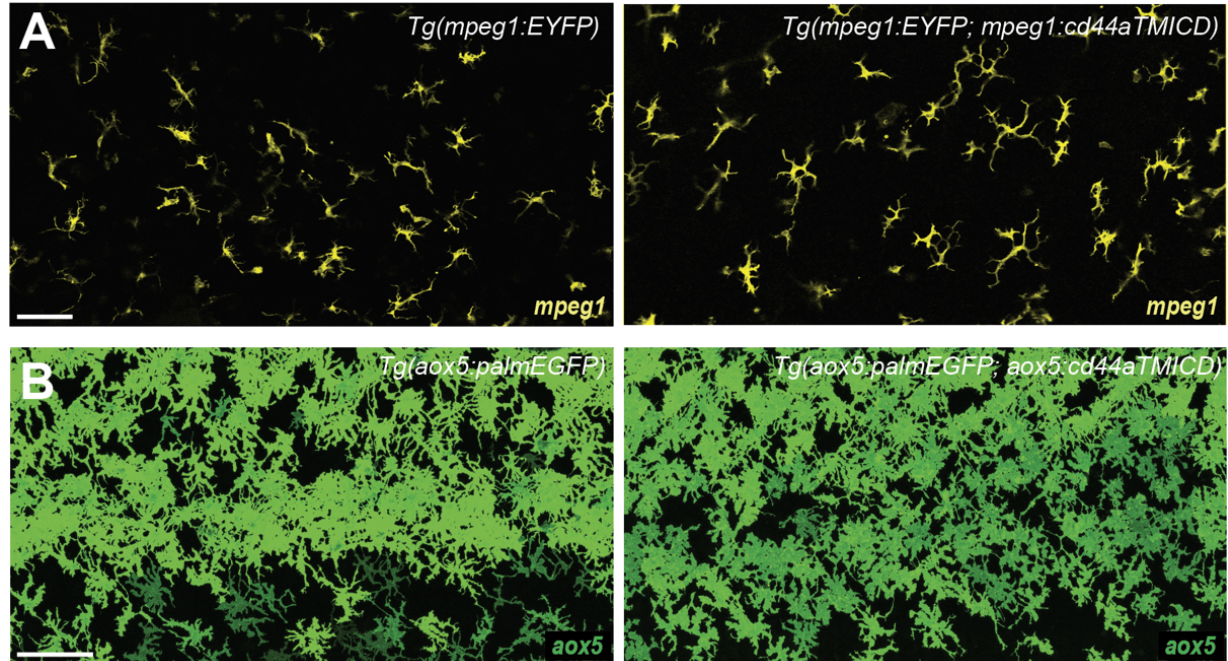

**Figure S2. Overexpression of *cd44aTMICD* does not alter cell survival or behavior**

(A) Macrophages, labelled with an *mpeg1* promoter driving membrane YFP, display no difference in cell count or morphology when compared to cells with overexpressed *cd44aTMICD* under the *mpeg1* promotor. (B) Similarly, there is no noticeable change in appearance of xanthophore lineages overexpressing *cd44aTMICD* when compared to control fish. Scale bars represent 100µm (A, B).

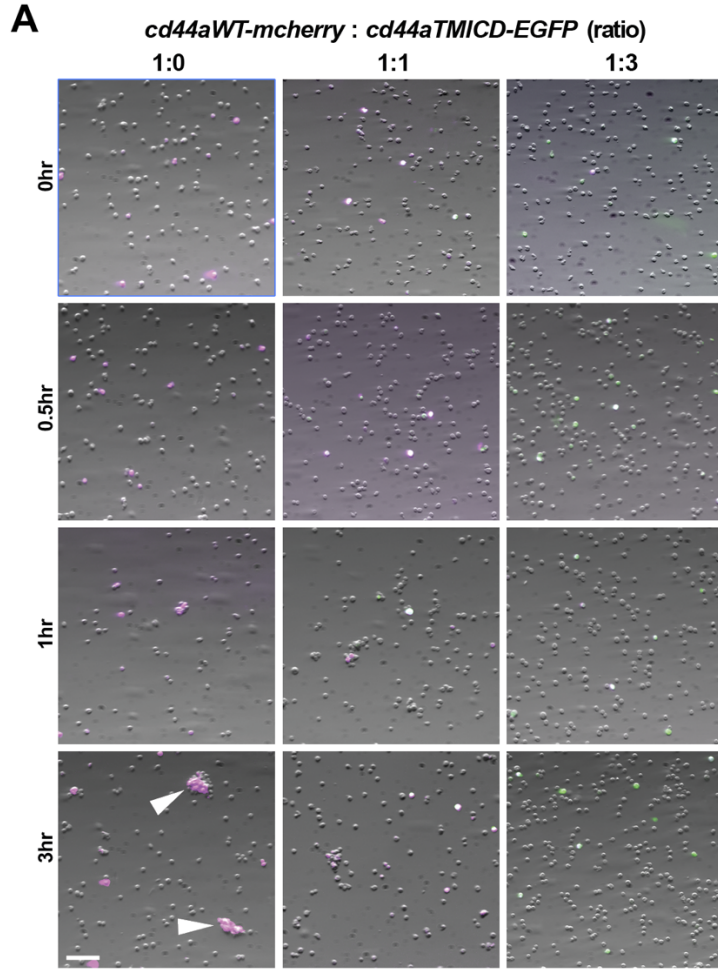

**Figure S3. Overexpressed CD44aTMICD outcompetes adhesive interaction mediated by wild type CD44a**

(A) S2 cells were transfected with constructs of *cd44aWT-mCherry* and *cd44aTMICD-EGFP* at various indicated ratios. Unlike the S2 cells transfected solely with *cd44aWT-mCherry*, those co-transfected with *cd44aTMICD-EGFP* exhibited a reduced capacity to form aggregates. Large cell aggregates were observed in cells expressing the wild type *cd44a* (white arrowheads). Co-transfected cells appeared white due to the co-expression of EGFP and mCherry (pseudo-colored in magenta), which are fused to either *cd44aTMICD* or *cd44aWT*. Cells expressing higher levels of EGFP in the 1:3 group displayed a greenish hue in white. Quantifications can be found in Fig. 4C. Scale bar: 100 $\mu$ m

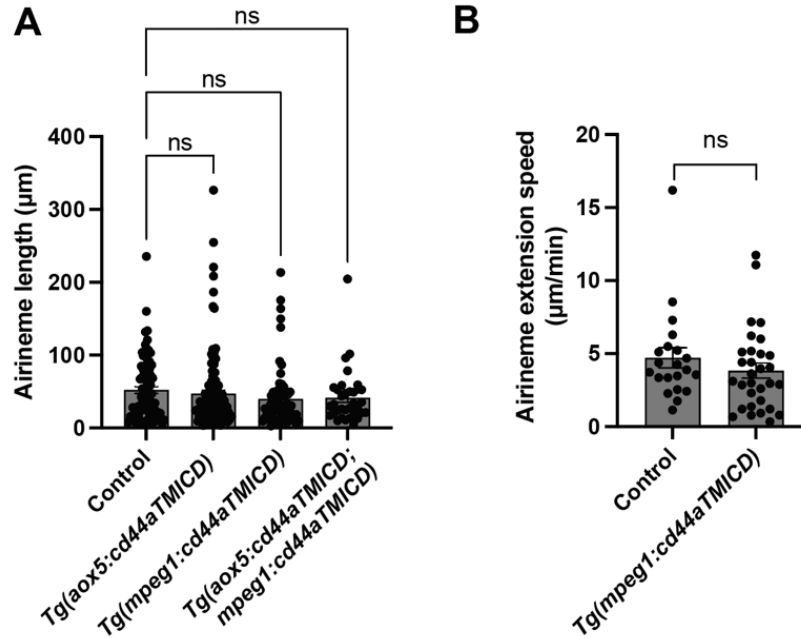

**Figure S4. Airineme length and speed remained consistent despite CD44a manipulations**

(A) There was no significant difference in airineme length in embryos where cd44aTMICD was overexpressed either in xanthophore-lineages, macrophages, or in both concurrently, ( $F_{(3, 288)}=1.020$ ,  $P=0.3843$ ). (B) There was no statistically significant difference in airineme extension speed in embryos overexpressing cd44aTMICD in macrophages,  $P=0.2968$ , 3 embryos each. Statistical significance was assessed using a One-way ANOVA, followed by a Tukey's HSD post hoc test or a Student's t test. Error bars indicate mean  $\pm$  SEM.

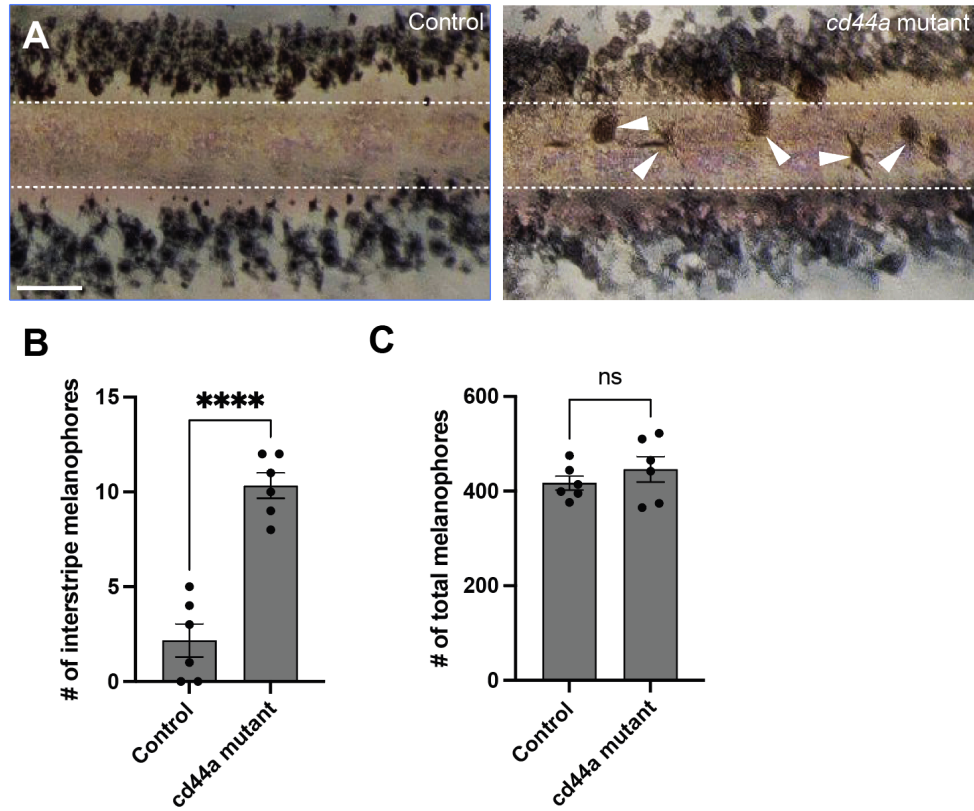

**Figure S5. Mutants of *cd44* induced by CRISPR/Cas9 exhibit defective zebrafish pigment patterns**

(A) Melanophores failed to coalesce into stripe and remained in the interstripe zone (white arrowheads) in *cd44* mutants. White dotted lines demarcate stripes and interstripe. (B) In *cd44* mutant embryos, the count of interstripe melanophores was significantly higher, ( $P < 0.0001$ , 12 embryos in total). (C) However, the total number of melanophores was not differ in the experimental group as compared to the controls, ( $P = 0.3732$ , 12 embryos in total). Statistical significance was assessed using a Student's *t* test. Scale bars represent 200  $\mu\text{m}$ . Error bars indicate mean  $\pm$  SEM.
